# Supplementary material for: Structural, spectroscopic, magnetic behavior and DFT investigations ofl-tyrosinato nickel(ii) coordination polymer
Source: Royal Society of Chemistry journal article supplement (doi:10.1039/c5nj00972c), 2015-01-01
Supplement: c5nj00972c1.pdf [file c5nj00972c1.pdf]

**Supporting Information to**

**Structural, spectroscopic, magnetic behavior and DFT investigations of**

**L-tyrosinato nickel(II) coordination polymer.**

*Agnieszka Wojciechowska,<sup>\*a</sup>, Jan Janczak,<sup>b</sup> Zbigniew Staszak,<sup>c</sup>*

*Marek Duczmal,<sup>a</sup> Wiktor Zierkiewicz,<sup>a</sup> Jadwiga Tokar<sup>a</sup> and Andrew Ozarowski<sup>d</sup>*

<sup>a</sup> Faculty of Chemistry, Wrocław University of Technology, Wybrzeże Wyspiańskiego 27,  
50-370 Wrocław, Poland, Phone: +48 713203666; Fax: +48 71 320 43 60

<sup>b</sup> Institute of Low Temperature and Structure Research Polish Academy of Sciences,  
Okólna 2, 50-422 Wrocław

<sup>c</sup> Faculty of Computer Science and Management, Wrocław University of Technology,  
Wybrzeże Wyspiańskiego 27, 50-370 Wrocław

<sup>d</sup> National High Magnetic Field Laboratory, Florida State University, 1800 East Paul Dirac Drive,  
Tallahassee, Florida 32310

Corresponding Author. Agnieszka Wojciechowska, Faculty of Chemistry, Wrocław University of  
Technology, Wybrzeże Wyspiańskiego 27, 50-370 Wrocław, Poland, Phone: +48 713203666;  
Fax: +48 71 320 43 60.

**KEYWORDS** *L-tyrosine, nickel(II) complex, crystal structure, spectroscopy (FT-IR, FT-  
Raman, NIR-vis-UV), high-field EPR, magnetic properties, DFT calculations,*

**Table S1 Crystal data and structure refinement for (1)**

|                                                                                         |                                                                                   |
|-----------------------------------------------------------------------------------------|-----------------------------------------------------------------------------------|
| Empirical formula                                                                       | C <sub>28</sub> H <sub>28</sub> N <sub>4</sub> NiO <sub>6</sub> 4H <sub>2</sub> O |
| Formula weight (g/mol)                                                                  | 647.32                                                                            |
| Temperature (K)                                                                         | 295                                                                               |
| Wavelength                                                                              | 0.71073                                                                           |
| Radiation type                                                                          | MoK $\alpha$                                                                      |
| Crystal system, space group                                                             | Monoclinic, <i>P</i> 21                                                           |
| <i>a</i> , <i>b</i> , <i>c</i> (Å)                                                      | 9.6658(12), 13.5399(17), 11.4516(13)                                              |
| $\beta$ (°)                                                                             | 98.777(3)                                                                         |
| Cell Volume (Å <sup>3</sup> )                                                           | 1481.2(3)                                                                         |
| <i>Z</i>                                                                                | 2                                                                                 |
| D <sub>calc</sub> (Mg m <sup>-3</sup> )                                                 | 1.451                                                                             |
| Absorption coefficient (mm <sup>-1</sup> )                                              | 0.72                                                                              |
| Absorption correction                                                                   | Numerical                                                                         |
| F(000)                                                                                  | 680                                                                               |
| Crystal size (mm)                                                                       | 0.27 x 0.18 x 0.15                                                                |
| Colour                                                                                  | Grey                                                                              |
| Index ranges <i>h</i> , <i>k</i> , <i>l</i>                                             | -13 ≤ <i>h</i> ≤ 12, -17 ≤ <i>k</i> ≤ 18, -10 ≤ <i>l</i> ≤ 15                     |
| T <sub>min</sub> , T <sub>max</sub>                                                     | 0.863, 0.912                                                                      |
| Reflection collected, independent and observed                                          | 17584, 7432, 3952                                                                 |
| [ <i>I</i> > 2σ( <i>I</i> )] reflections                                                |                                                                                   |
| ( <i>R</i> <sub>int</sub> )                                                             | 0.084                                                                             |
| (sin θ/λ) <sub>max</sub> (Å <sup>-1</sup> )                                             | 0.694                                                                             |
| R[ <i>F</i> <sup>2</sup> > 2σ( <i>F</i> <sup>2</sup> )], wR( <i>F</i> <sup>2</sup> ), S | 0.085, 0.094, 1.01                                                                |
| Refinement                                                                              | Full-matrix least-square on <i>F</i> <sup>2</sup>                                 |
| No. of reflections                                                                      | 7432                                                                              |
| No. of parameters                                                                       | 430                                                                               |
| No. of restraints                                                                       | 21                                                                                |
| H-atom treatment                                                                        | H atoms treated by a mixture of independent and constrained refinement            |
| Largest difference in peak and hole (e Å <sup>-3</sup> )                                | 0.35, - 0.48                                                                      |
| Absolute structure parameter                                                            | 0.051(18) [Ref. S1]                                                               |

Ref. S1 H. D. Flack, *Acta Cryst.*, 1983, **A39**, 876-881.

**Table S2 The experimental, theoretical energies and band assignments of *d-d* transition for 1.**

| O <sub>h</sub>                            | D <sub>4h</sub>                           | Refl. <sup>a</sup> | Calc. <sup>b</sup> |
|-------------------------------------------|-------------------------------------------|--------------------|--------------------|
| Ground state <sup>3</sup> A <sub>2g</sub> | Ground state <sup>3</sup> B <sub>1g</sub> |                    |                    |
| <sup>3</sup> T <sub>2g</sub>              | <sup>3</sup> E <sub>g</sub>               | 10500              | 10440              |

|                     |                   |       |               |
|---------------------|-------------------|-------|---------------|
|                     | ${}^3B_{2g}$      | 11650 | 11700         |
| ${}^1E_g$           | $A_{1g} + B_{1g}$ | 13000 | 12908 + 12331 |
| ${}^3T_{1g}({}^3F)$ | ${}^3A_{2g}$      | 16400 | 16242         |
|                     | ${}^3E_g$         | 18400 | 17898         |
| ${}^3T_{1g}({}^3P)$ | ${}^3A_{2g}$      | 27300 | 27644         |
|                     | ${}^3E_g$         | 27700 | 27969         |

<sup>a</sup> Energies are taken from filtering the diffuse-reflectance spectrum. <sup>b</sup> Calculated values of energy were obtained for applying  $D_{4h}$  symmetry ( $Dq = 1170 \text{ cm}^{-1}$ ,  $Ds = 457 \text{ cm}^{-1}$ ,  $Dt = 130 \text{ cm}^{-1}$ ,  $B = 820 \text{ cm}^{-1}$ ).

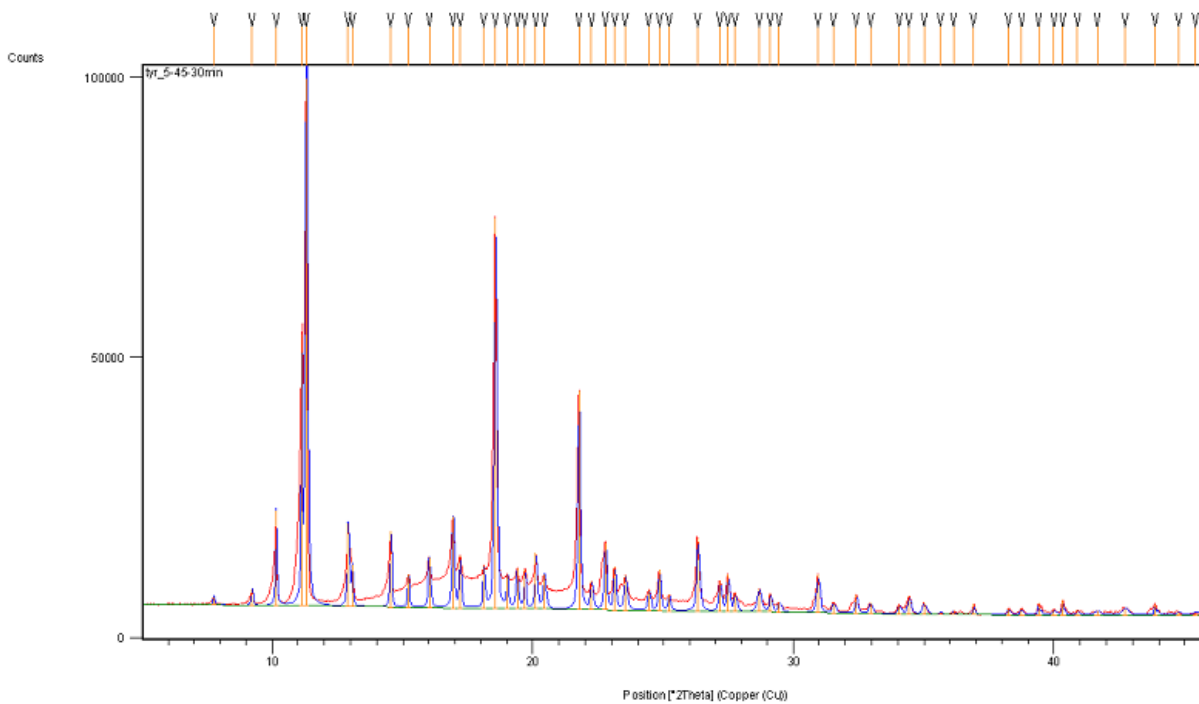

Fig. S1. XRD patterns for 1. The bars at the bottom show positions and relative intensity of peaks calculated from the crystal structure model obtained from the single-crystal X-ray diffraction.

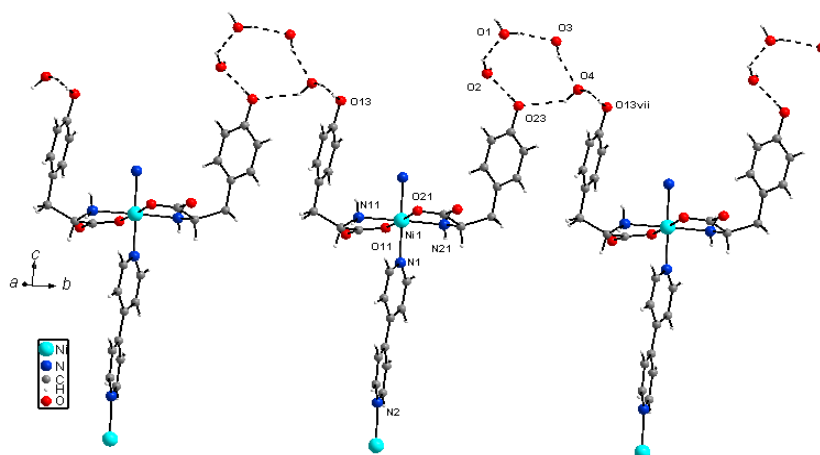

Fig. S2 The motives of five membered rings are formed by O23—H23 $\cdots$ O2, O2—H4*W* $\cdots$ O1, O1—H2*W* $\cdots$ O3, O3—H5*W* $\cdots$ O4 and O4—H8*W* $\cdots$ O23 hydrogen bonds as well as chain based on O4—H8*W* $\cdots$ O23 and O4—H7*W* $\cdots$ O13<sup>vi</sup> bonds joining the parallel 1D polymer chains.

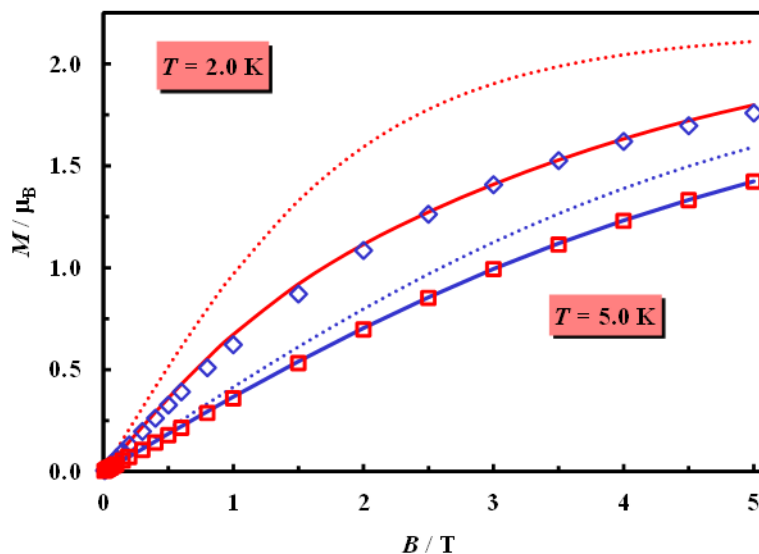

Fig. S3 Magnetization as a function of magnetic induction. The dotted lines are the Brillouin functions calculated for  $S = 1$  and the average EPR  $g = 2.1687$ . The solid lines are calculated with the parameters obtained by least-squares fitting of the susceptibility.

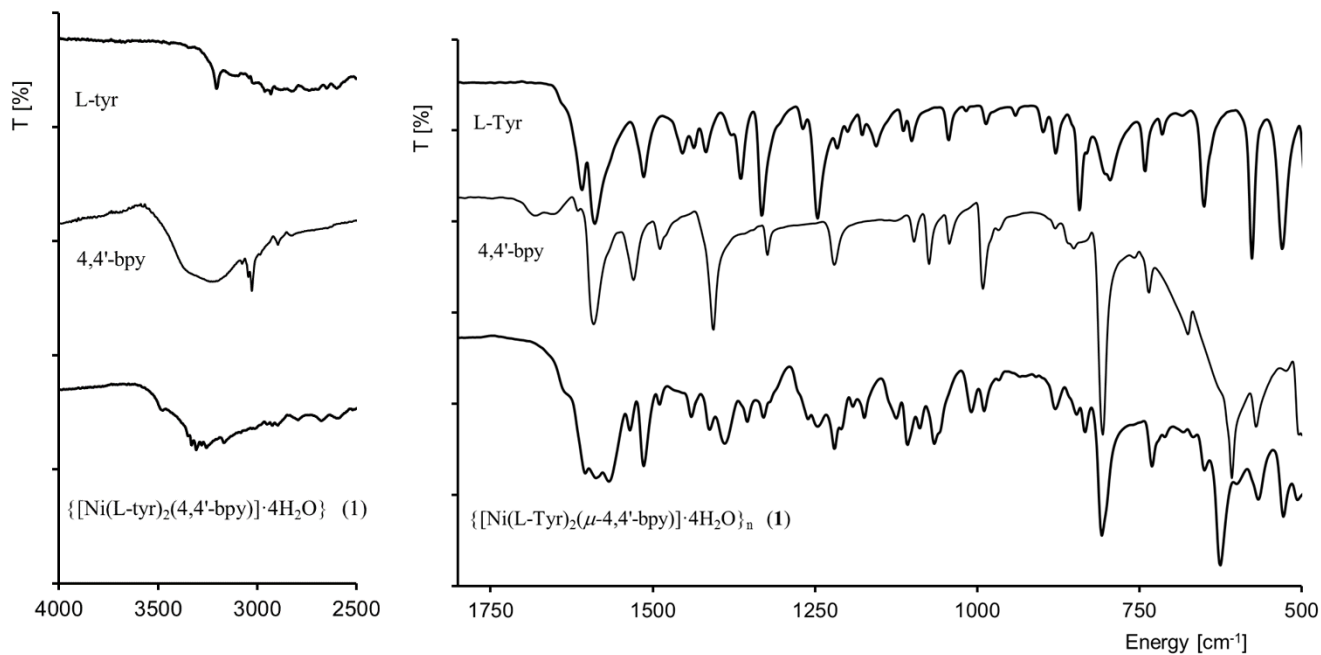

Fig. S4 FT-IR spectra of pure L-tyrosine, 4,4'-bipyridine and complex **1**.

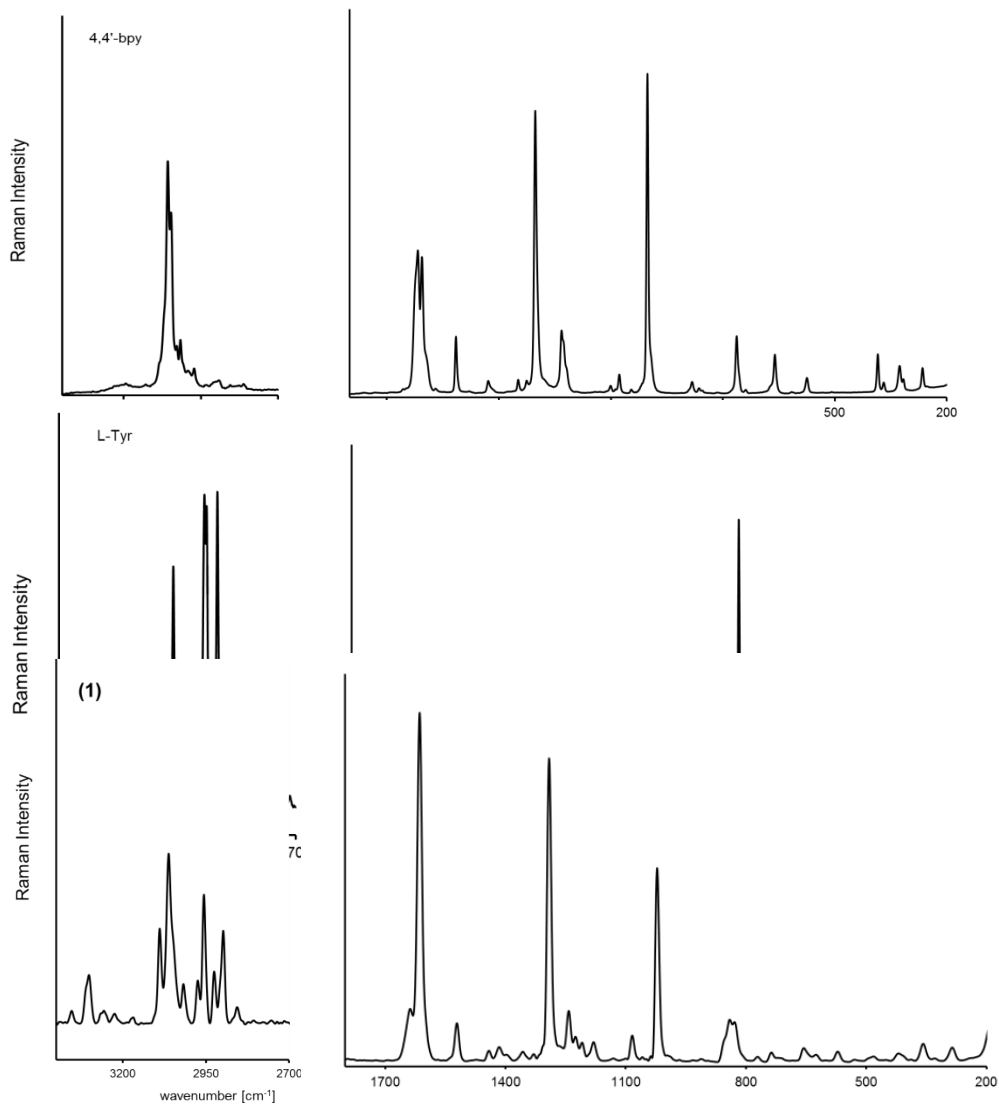

Fig. S5 The Raman of pure ligands (4,4'-bpy, L-Tyr) and complex **1**.

a)

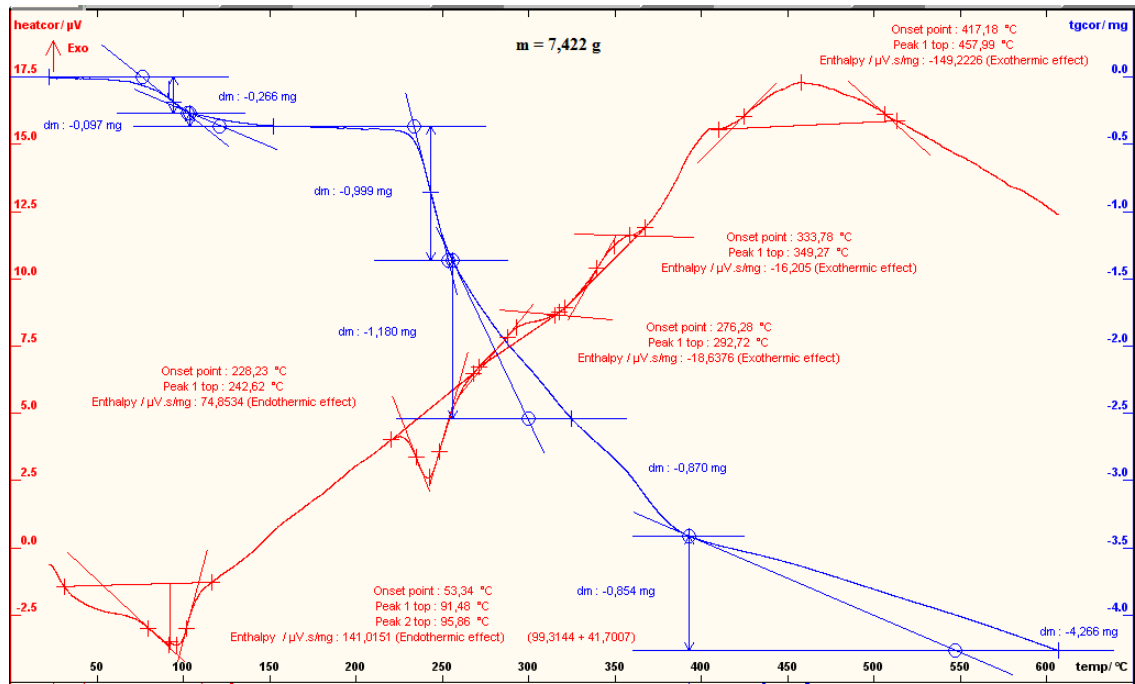

b)

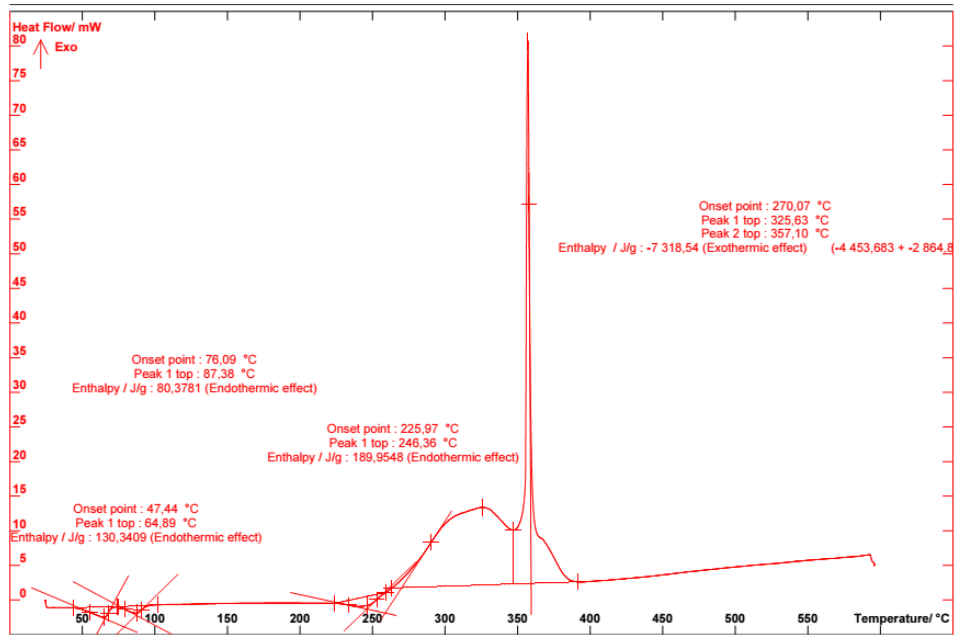

Fig. S6. a) TG-DTA and b) DSC.

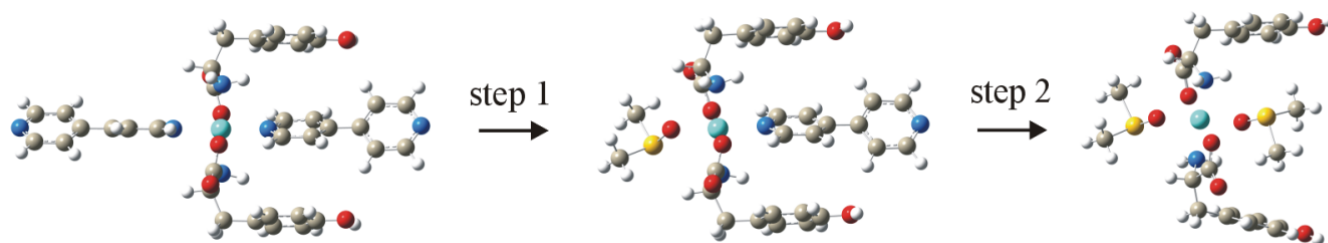

Fig. S7 Proposed simplified mechanism of the 4,4'-bipyridine replacement by the DMSO molecules in  $[\text{Ni}(\text{L-Tyr})_2(\mu\text{-}4,4'\text{-bpy})_2]$ .

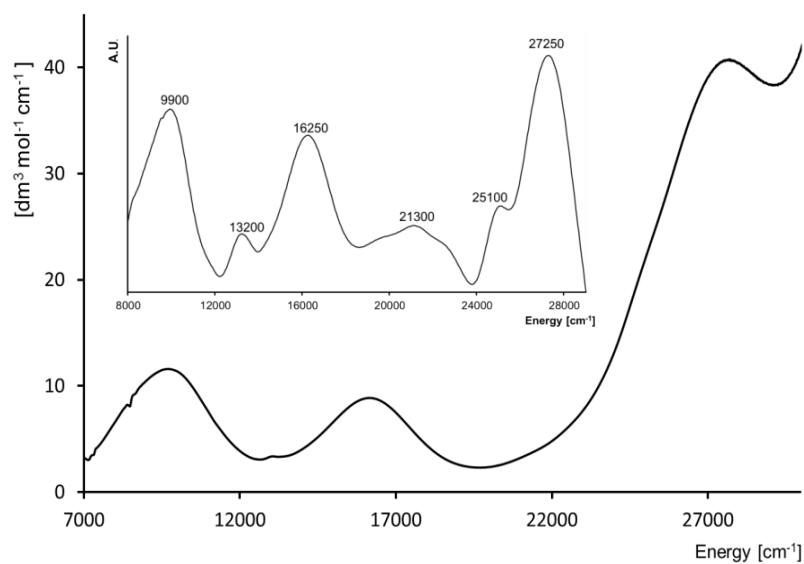

Fig. S8 The absorbance spectrum of complex **1** in DMSO and (inset) the effect of filter analysis (filter parameters : step = 50,  $\alpha$  = 200 and N = 20).
